# Supplementary material for: Decoupling PER phosphorylation, stability and rhythmic expression from circadian clock function by abolishing PER-CK1 interaction
Source: PubMed Central journal article supplement (PMC9271041; doi:10.1038/s41467-022-31715-4), 2022-07-09
Supplement: 41467_2022_31715_MOESM1_ESM.pdf [file 41467_2022_31715_MOESM1_ESM.pdf]

# **Supplementary Information**

**Title: Decoupling PER phosphorylation, stability and rhythmic expression from circadian clock function by abolishing PER-CK1 interaction**

**An et al.**

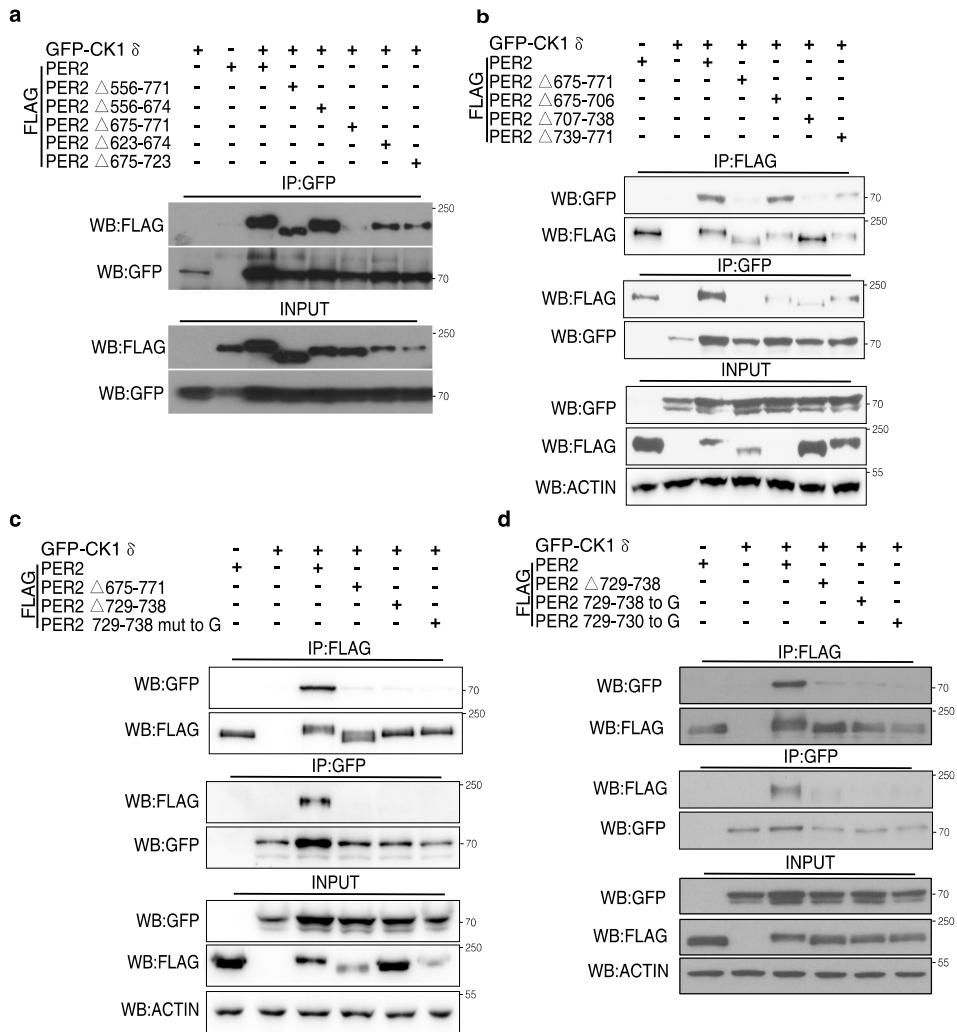

### Supplementary Figure 1. PER2 729 and 730 amino acids play the critical role in PER2-CK1 $\delta$ interaction.

Western blot analyses and immunoprecipitation assays show the difference of interaction strength between CK1  $\delta$  and hPER2 with indicated deletions or mutations.

- (a) Analyses of hPER2 deletion constructs between 556 and 771 amino acids sites show that the CK1 $\delta$  binding site is within 675 to 771 amino acid regions.
- (b) Analyses of hPER2 deletion constructs between 675 and 771 amino acids show that the CK1 $\delta$  binding site is within 707 to 738 amino acid regions.
- (c) Analyses of hPER2 deletion constructs between 675-738 amino acids sites and 729-738 mutant constructs show that the CK1 $\delta$  binding site is within 729 to 738 amino acid regions.
- (d) Analyses of hPER2 mutation constructs between 729 and 738 amino acids sites show that the key CK1 $\delta$  binding sites are 729 and 730 amino acids.

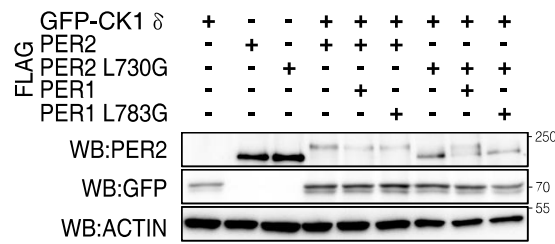

**Supplementary Figure 2. PER1 L783G mutation abolishes the PER1's ability to promote CK1 phosphorylation of PER2 (L730G).**

FLAG tagged PER1 with or without mutant, FLAG tagged PER2 with or without mutant and GFP tagged CK1 $\delta$  were co-expressed in HEK293 cells (every 60-mm dish of cells was transfected with 2  $\mu$ g of PER1 plasmid, 2  $\mu$ g of PER2 plasmid and 1  $\mu$ g of CK1 $\delta$  plasmid). The levels of PER proteins and CK1 $\delta$  were determined by western blot using anti-FLAG (sigma, 1:1000) and GFP (sigma, 1:1000) antibody, respectively.

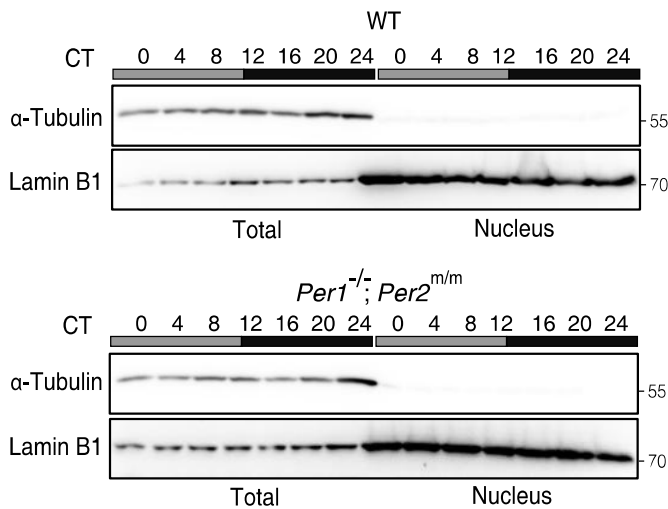

**Supplementary Figure 3.** Western blot identified WT and *Per1*<sup>-/-</sup>; *Per2*<sup>m/m</sup> mice liver extract total Protein ( $\alpha$ -Tubulin), nuclear protein (Lamin B1).

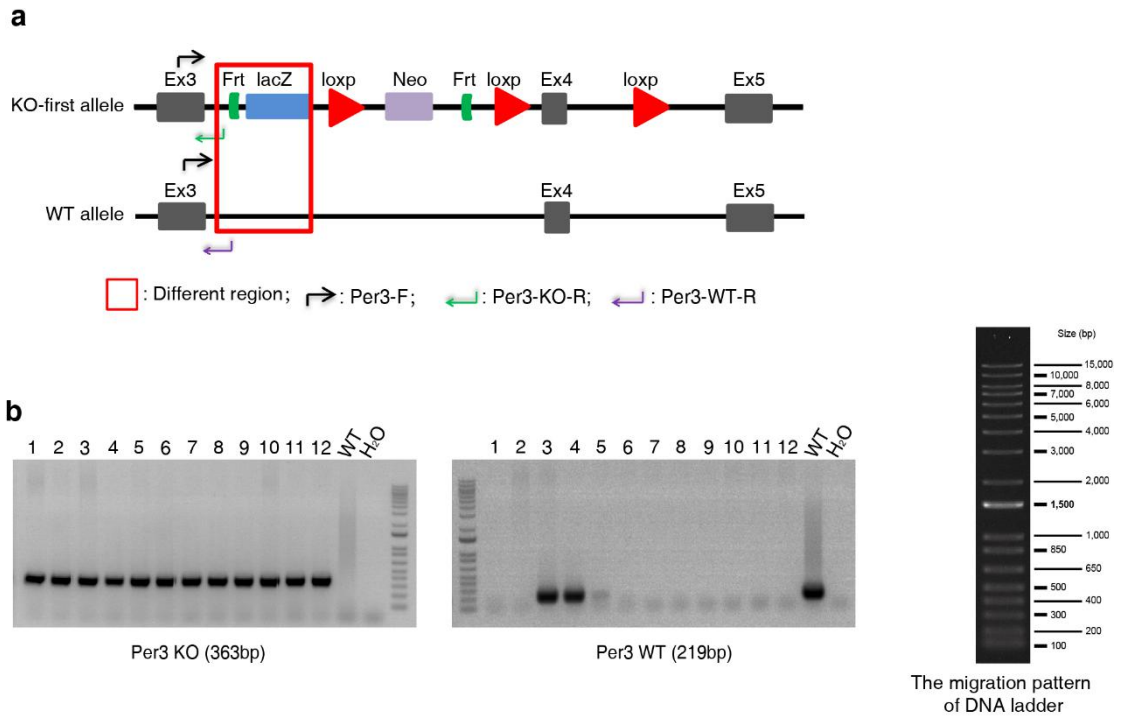

**Supplementary Figure 4. Targeting strategy and Genotyping.**

**(a)** Targeting strategies for *Per3* using EPD0602\_1\_G05 ES clone. The LacZ element contains a stop codon that also interrupts the transcription of *Per3*.

**(b)** PCR were used to confirm *Per3* knockout mice.
